# Supplementary material
Source: PubMed Central journal article supplement (PMC3901066)

## Supplementary Materials

### Supplementary Figure Legends

#### Supplementary Figure 1. Analysis of B and T cells in spleens of 3-week-old mice

Total splenocytes were isolated from spleens of 3-week-old mice, stained for B220-V450, CD3 $\epsilon$ -APC (BD Biosciences), CD19-APC, and CD20-PE (eBiosciences), followed by flow cytometric analyses. All numbers represent percentage of cells in each gate. **(Top)** Representative flow cytometry plots indicating percentages of CD3 $^{+}$  and B220 $^{+}$  populations in spleens of 3-week-old mice. **(Middle and Bottom)** Representative flow cytometry plots indicating frequencies of B cells with B cell markers B220, CD19, and CD20.

#### Supplementary Figure 2. Immunophenotypes of pre-tumor B cells

Total splenocytes were isolated from spleens of 3-week-old mice, stained for B220-V450, IgM-FITC, IgD-PE, CD138-PE, GL-7-FITC, Fas-PE-Cy7 (BD Biosciences), followed by flow cytometric analyses. **A)** Representative flow cytometry plots demonstrating frequencies of CD138 $^{+}$  cells (a plasma cell marker). **B)** Representative flow cytometry plots demonstrating frequency of immature B cells (IgM $^{+}$  IgD $^{-}$ ) and mature B cells (IgM $^{+}$  IgD $^{+}$ ). **C)** Representative flow cytometry plots demonstrating frequencies of germinal center B cells (Fas $^{+}$  GL-7 $^{+}$ ).

#### Supplementary Figure 3. Histology of tumor-bearing lymph nodes of transgenic mice

Tumor-bearing lymph nodes were isolated from mice, fixed in 10% buffered formalin phosphate, and embedded in paraffin. Tissue sections from indicated genotypes were stained with hematoxylin and eosin (H&E). Tumor cells were monomorphic and round with deep blue nuclei. Infiltration of macrophages engulfing apoptotic cells was frequent and gave the “starry sky” appearance of tumors in all genotypes (X20).

#### **Supplementary Figure 4. Phenotypes of pre-tumor mice**

**A)** Total splenocytes were harvested from 3-week-old mice, stained for CD19-APC (y-axis) and CD3 $\epsilon$ -FITC (x-axis), and analyzed by flow cytometry. Percentages of cells in each quadrant are indicated. **B)** Spleen weights from 3-week-old mice were normalized and were shown as percentage of body weight. Data shown as mean  $\pm$  SD.

#### **Supplementary Figure 5. Upregulation of *Cks1* in LMP2A/ $\lambda$ -MYC pre-tumor B cells**

**A)** Western blot analyses of *Cks1* and *Skp2* in purified pre-tumor B cells from LMP2A/ $\lambda$ -MYC and  $\lambda$ -MYC mice. **B)** qRT-PCR of *Cks1* mRNA levels in LMP2A/ $\lambda$ -MYC and  $\lambda$ -MYC pre-tumor B cells. The fold change was analyzed using *Cks1* levels in  $\lambda$ -MYC as a control group. The difference was analyzed using Student-*t* test and shown as mean  $\pm$  SD.

Lymphocyte gate

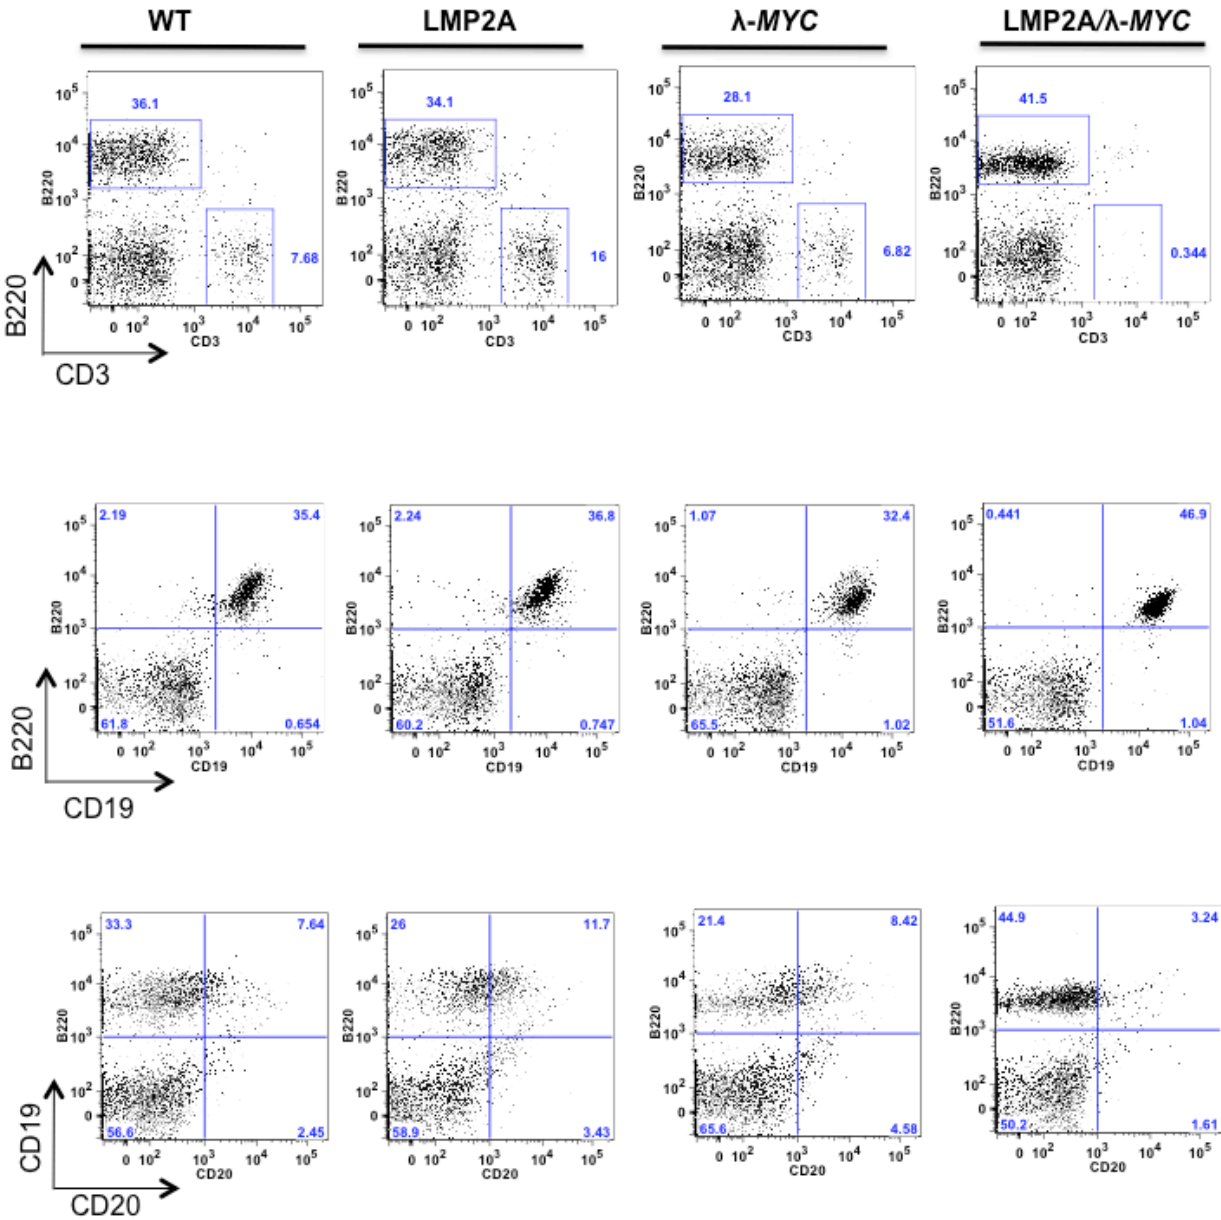

**A.** Lymphocyte gate

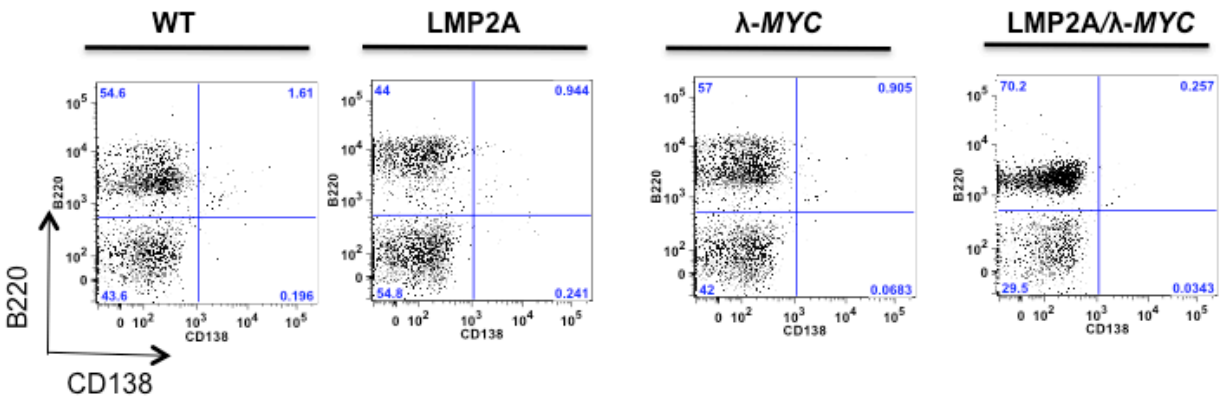

**B.** B220<sup>+</sup> gate

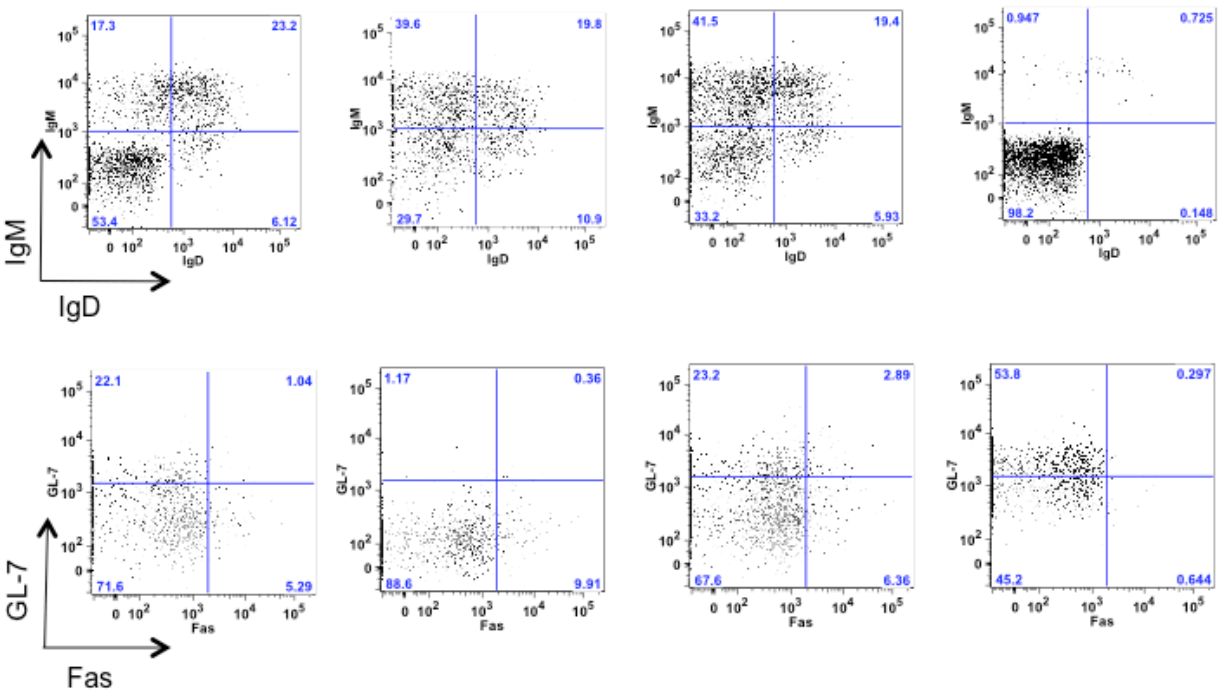

Fish\_Supplementary Fig.3

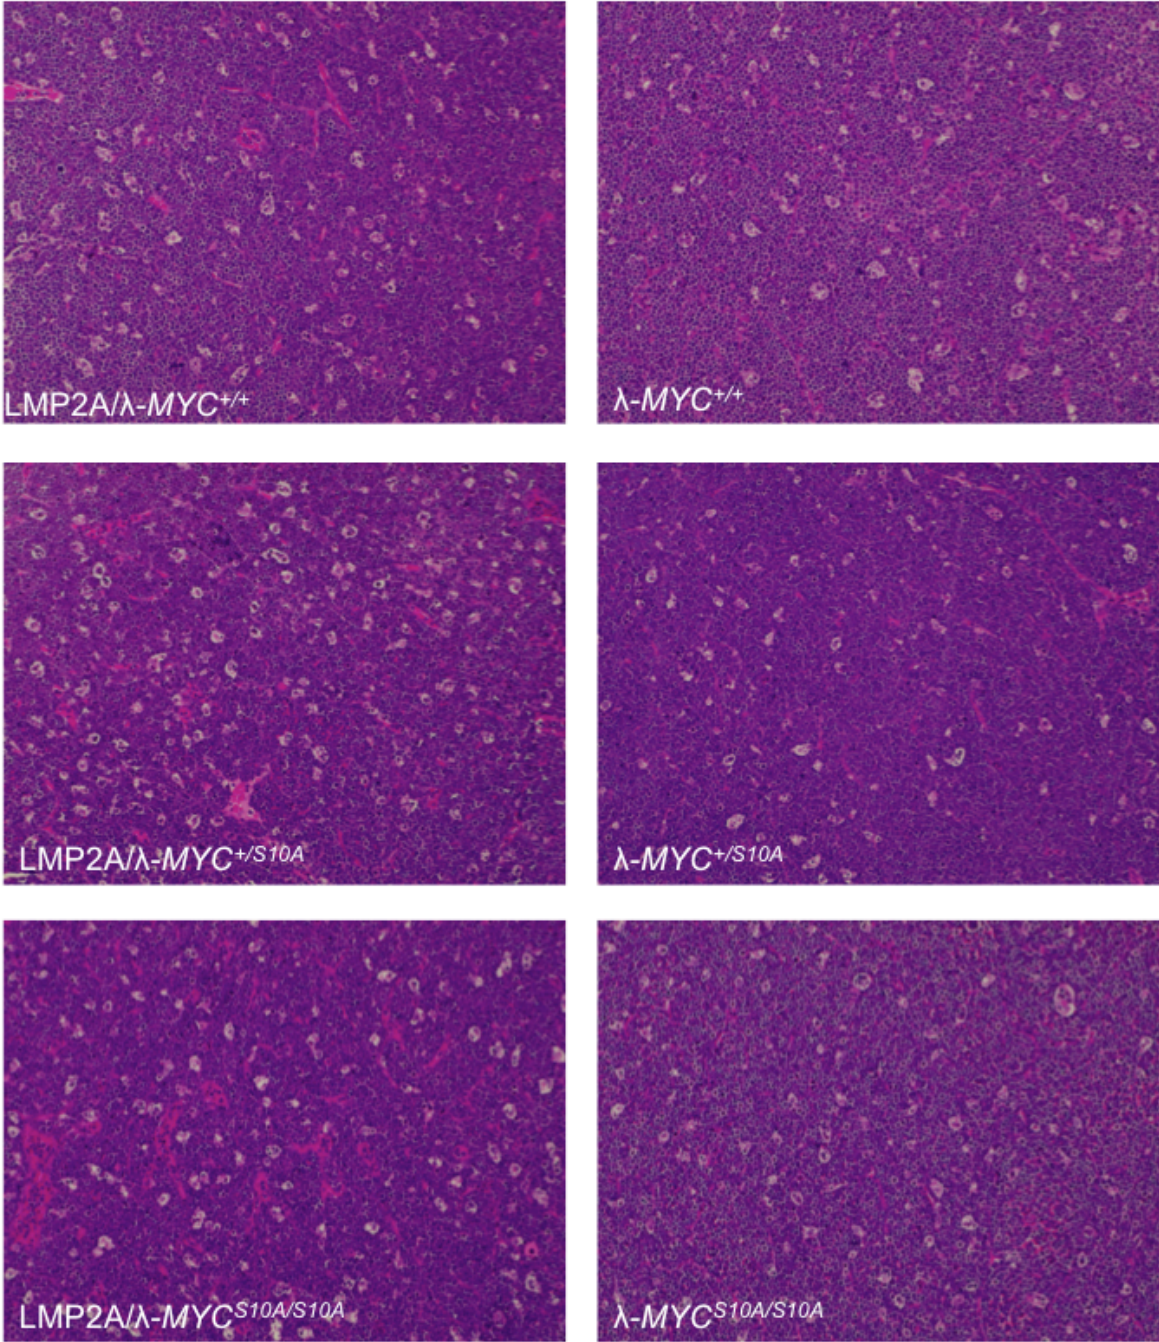



**A. Lymphocyte gate**

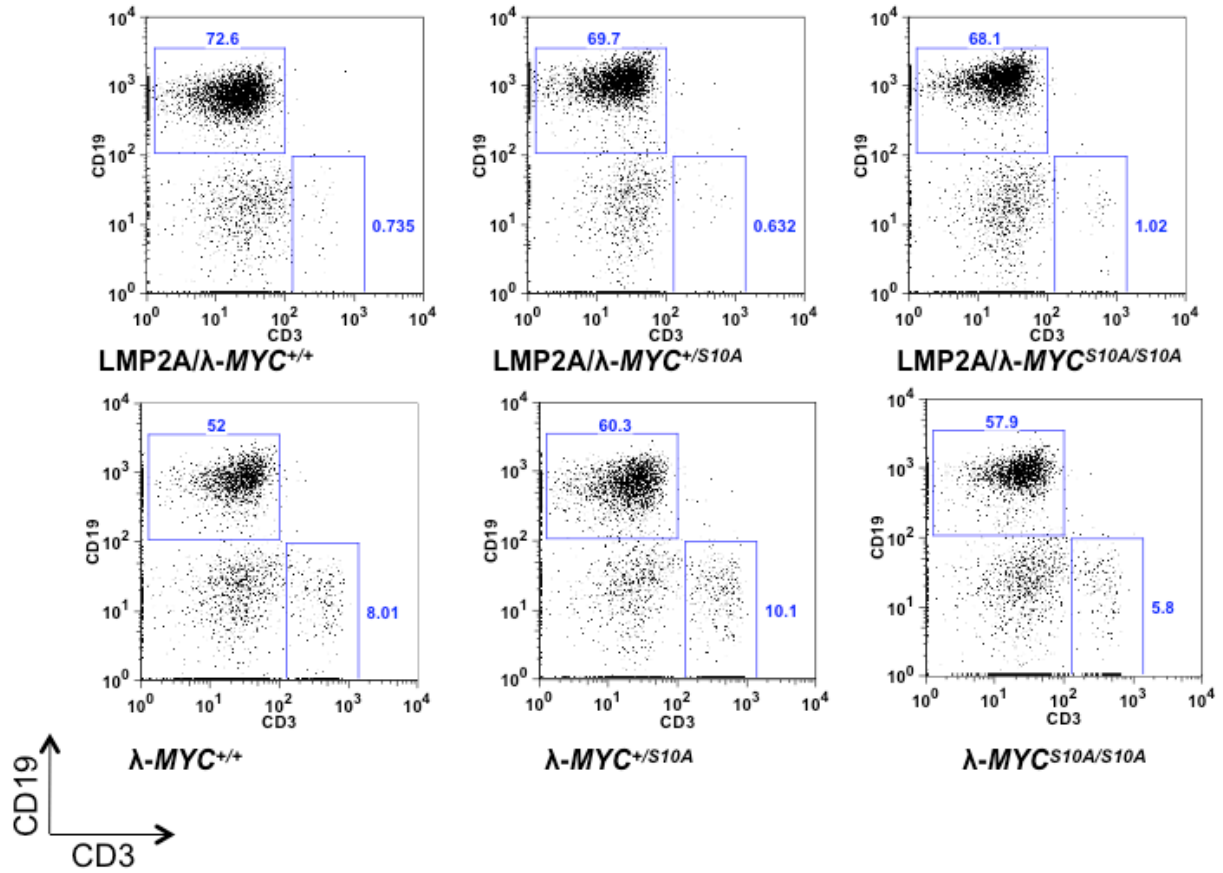

**B.**

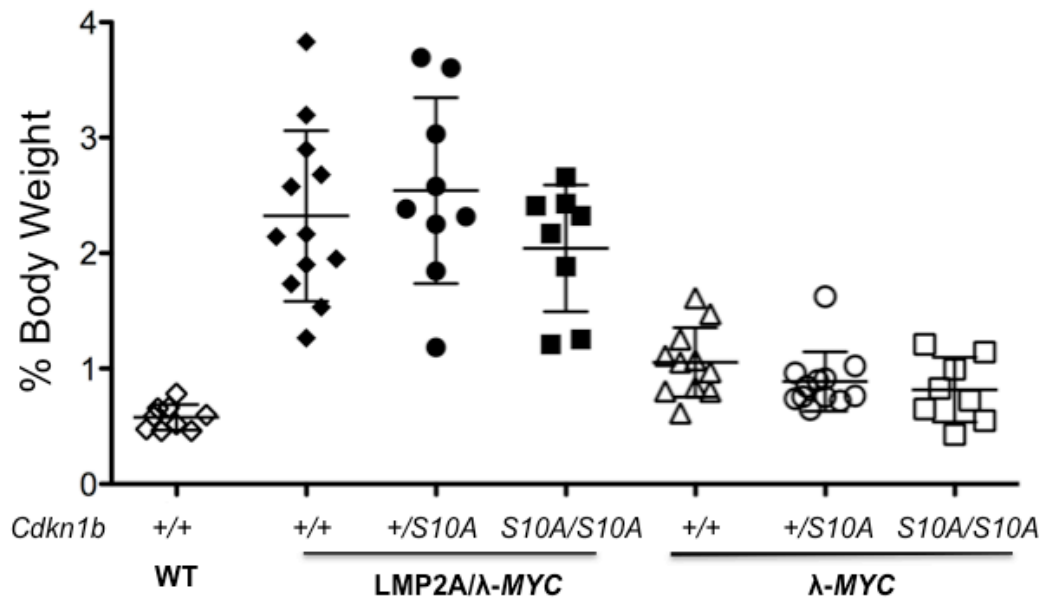

Fish\_Supplementary Fig. 5

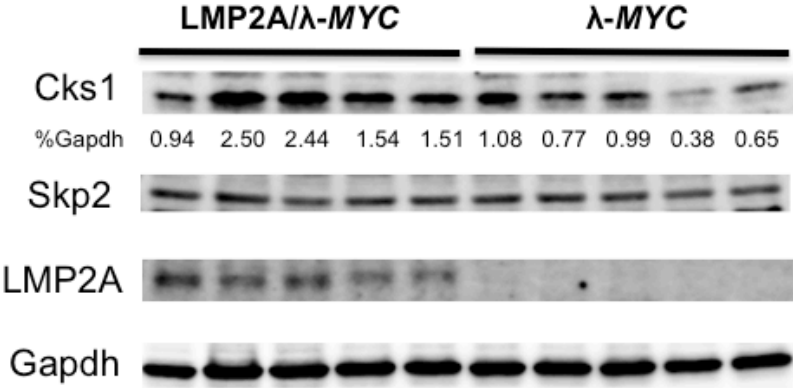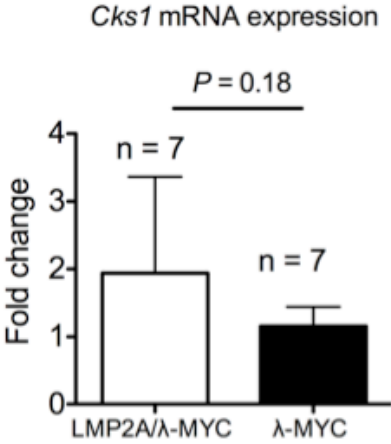

Supplement: supp_blood-2013-07-517649_blood-2013-07-517649-1.pdf [file supp_blood-2013-07-517649_blood-2013-07-517649-1.pdf]
